# Supplementary material for: Cetyltrimethylammonium Bromide (CTAB)-Loaded SiO2–Ag Mesoporous Nanocomposite as an Efficient Antibacterial Agent
Source: PubMed Central journal article supplement (PMC7917824; doi:10.3390/nano11020477), 2021-02-13
Supplement: nanomaterials-11-00477-s001.pdf [file nanomaterials-11-00477-s001.pdf]

## Supporting Information

# Cetyltrimethylammonium Bromide (CTAB)-Loaded $\text{SiO}_2$ -Ag Mesoporous Nanocomposite as an Efficient Antibacterial Agent

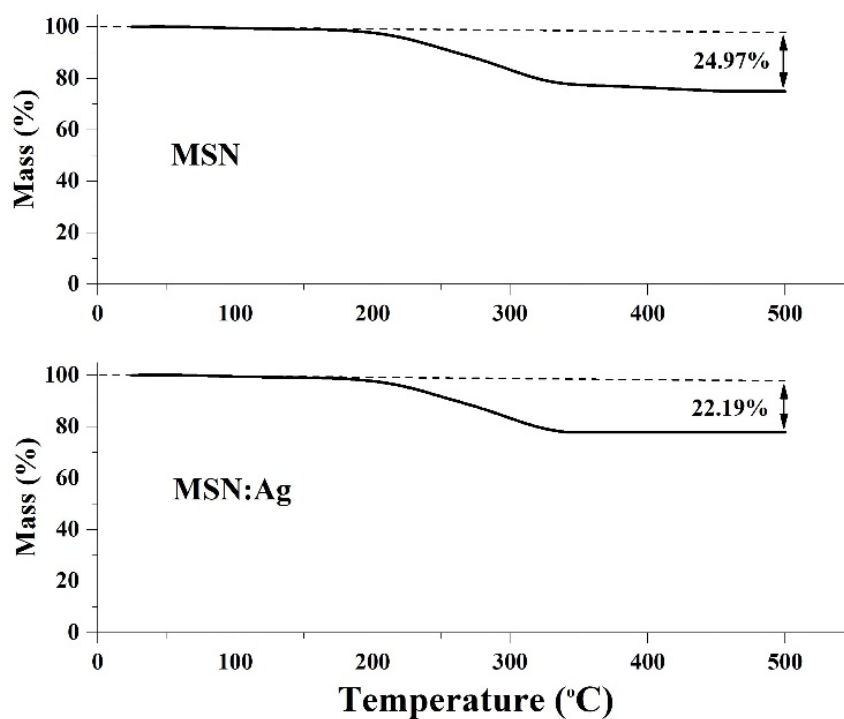

Figure S1. TGA curves for bare MSN and MSN:Ag.

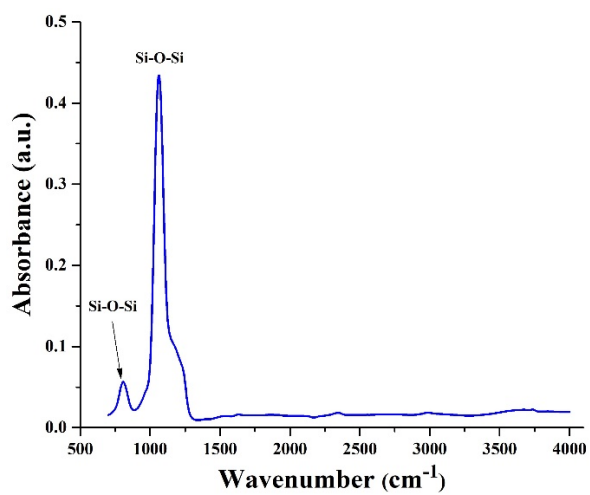

**Figure S2.** FTIR analysis of MSN:Ag nanocomposite after the TGA.

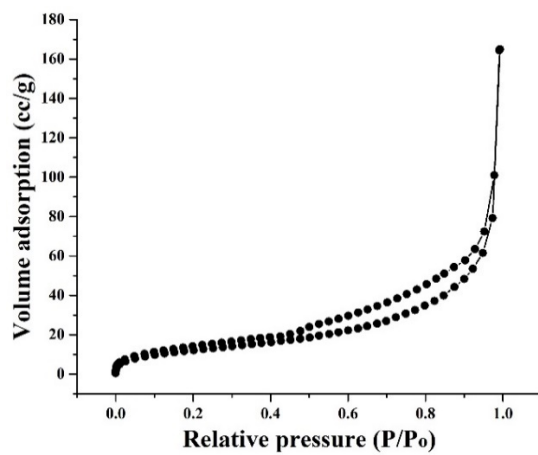

**Figure S3.** Nitrogen adsorption-desorption isotherm of MSN:Ag after the synthesis process.

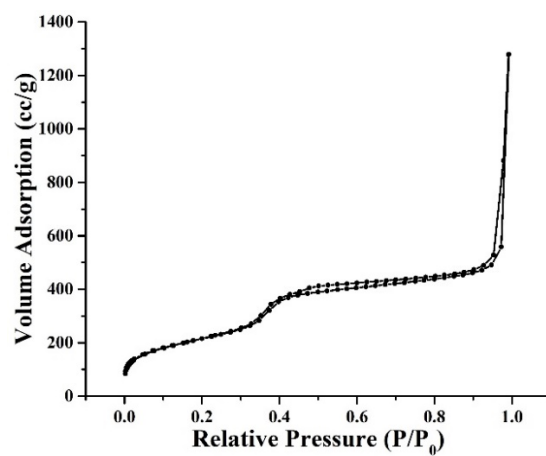

**Figure S4.** Nitrogen adsorption-desorption isotherm of MSN:Ag after the calcination at 500 °C.

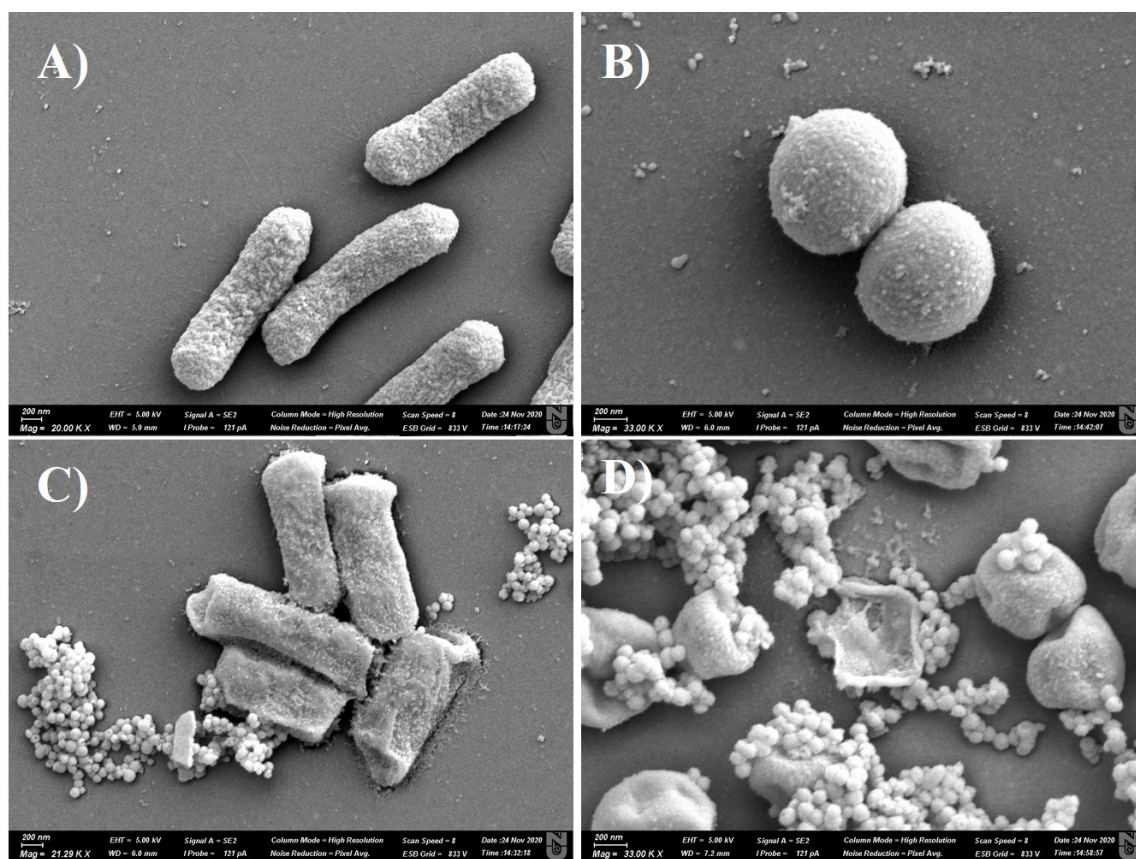

**Figure S5.** SEM images of control *E.coli* (A) and *S.aureus* (B). SEM images of MSN:Ag incubated with *E.coli* (C) and *S.aureus* (D).
